# Supplementary material for: Safeguarding climate-resilient mangroves requires a small increase in the global protected area
Source: Research Square preprint supplement (doi:10.21203/rs.3.rs-5693704/v1), 2025-01-20
Supplement: Supplementary file 1 [file 649471db535eab6b31c76c38.docx]

# **Supplementary Material**


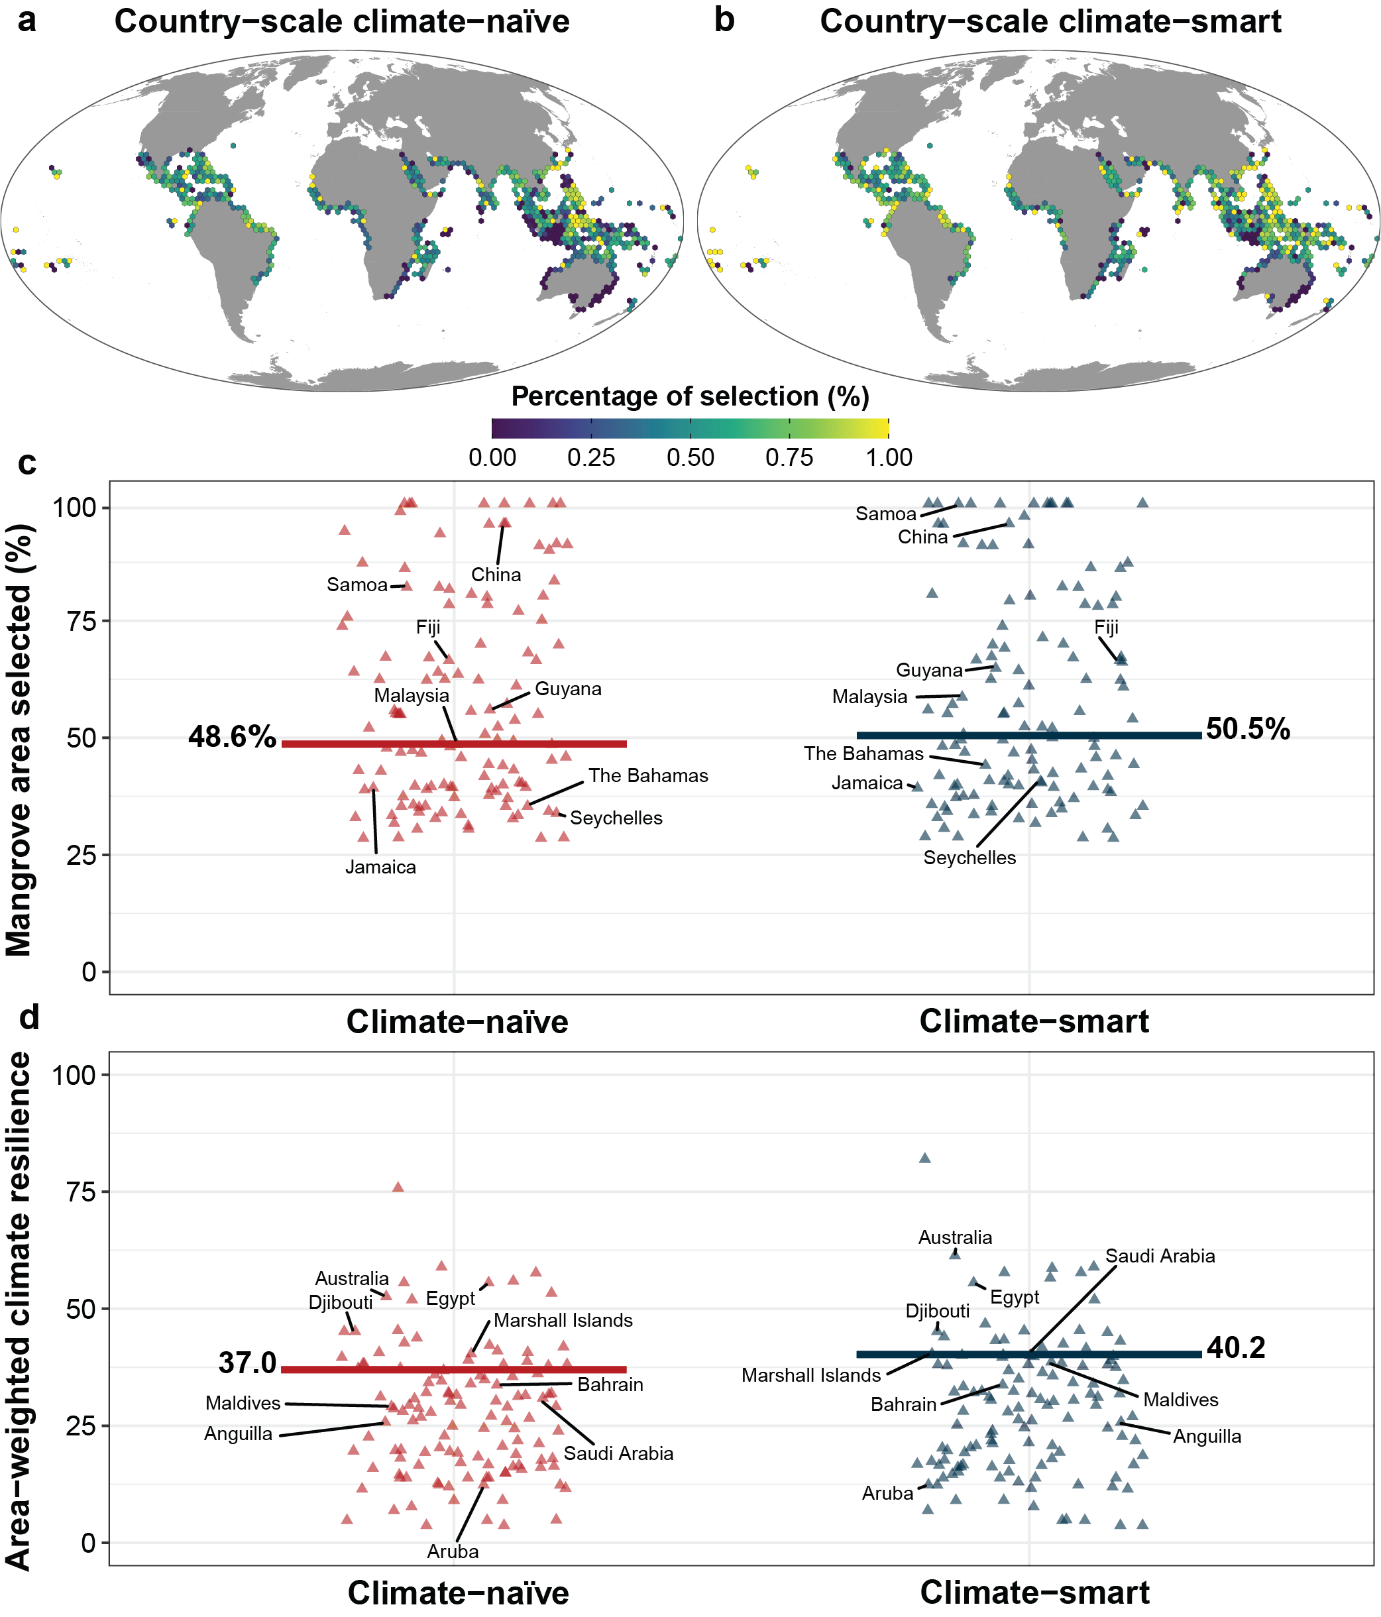


**Supp. Fig. 1 | Country-scale results of the climate-naïve and climate-smart prioritisations.** Results of the **a-b**,country-scale **a**,climate-naïve and **b**,climate-smart spatial prioritisation. Note that the % selection is shown because the original 631 km2 for each planning unit in the analysis was aggregated at a resolution of ~63,000 km2 for visualisation. **c**, % mangrove area selected and **d**, area-weighted climate resilience of the mangrove areas selected in the prioritisations by country (each country is a triangle). Both prioritisations used a climate-smart threshold of 0.3. The horizontal lines show **c**, the total % of mangrove area selected and **d**, the global average climate resilience.


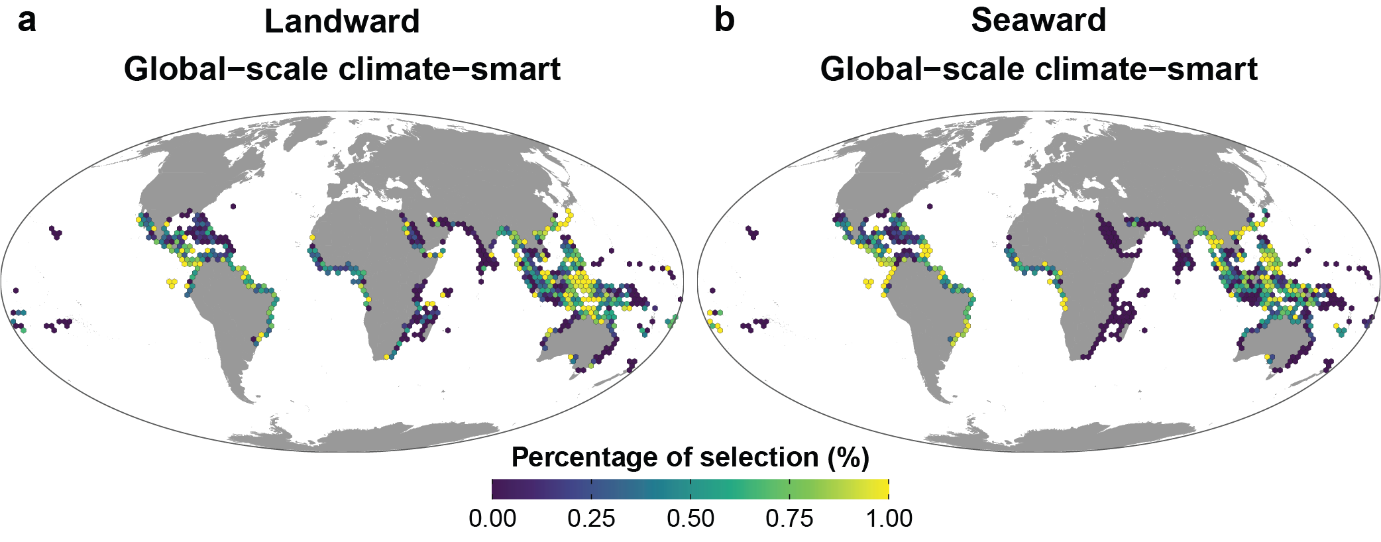


**Supp. Fig. 2 | Global-scale climate-smart results of the landward and seaward prioritisations.** Results of the **a-b**,global-scale climate smart **a**,landward and **b**,seaward spatial prioritisation. Note that the % selection is shown because the original 631 km2 for each planning unit in the analysis was aggregated at a resolution of ~63,000 km2 for visualisation.
